# Supplementary material for: Poloxamer 407 Based Gel Formulations for Transungual Delivery of Hydrophobic Drugs: Selection and Optimization of Potential Additives
Source: MDPI journal article supplement (doi:10.3390/polym13193376), 2021-09-30
Supplement: s1 [file s1]

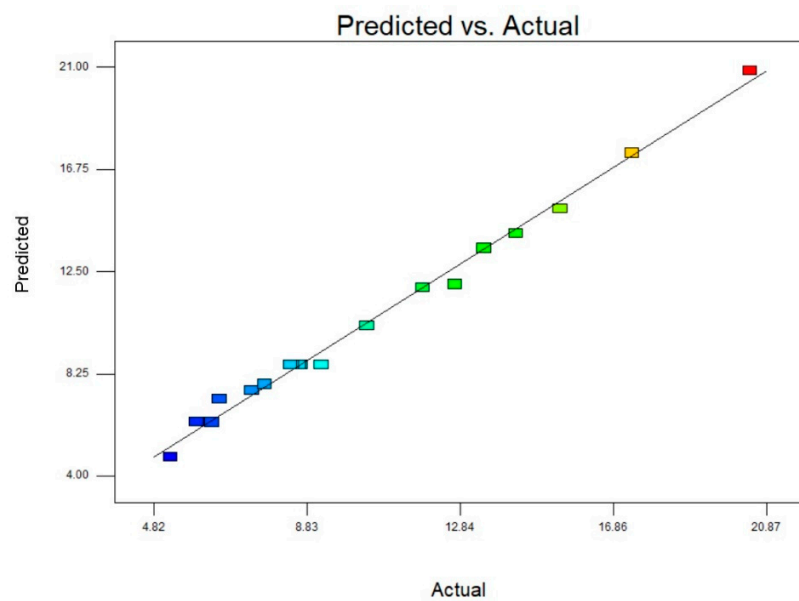

Supplementary figure S1. Design experts plot between predicted and actual values for gelation temperature

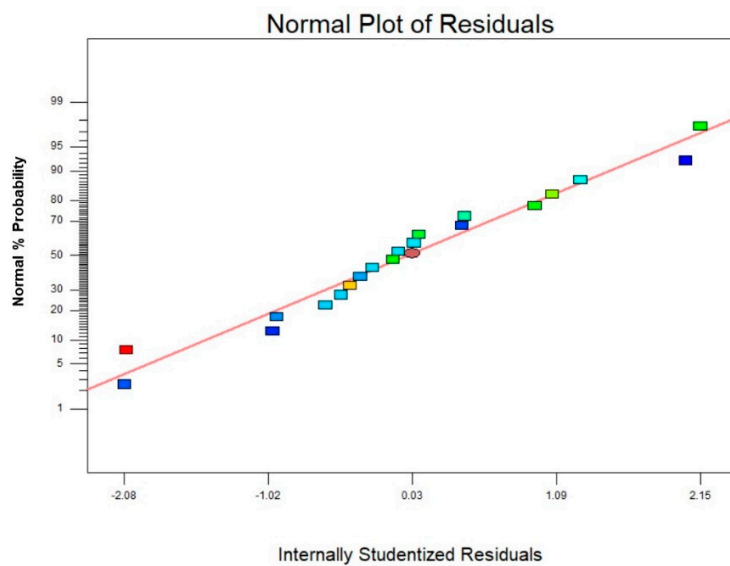

Supplementary figure S1. Normal plot of residuals for gelation temperature

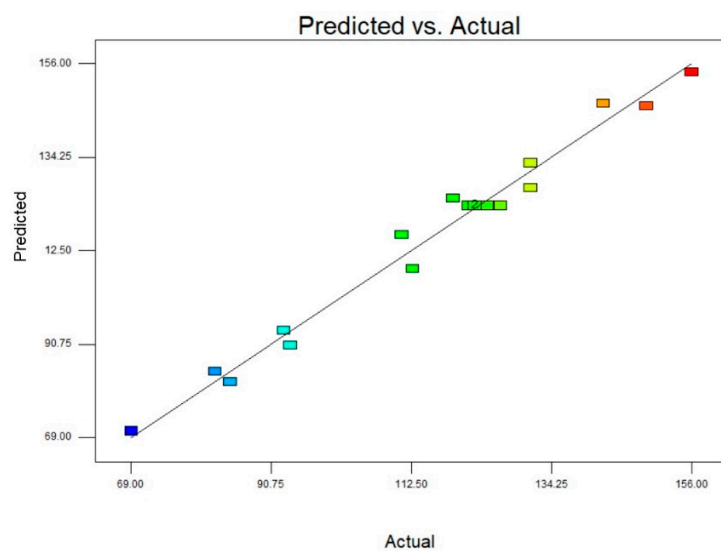

**Supplementary figure S3.** Design experts plot between predicted and actual values for gel strength

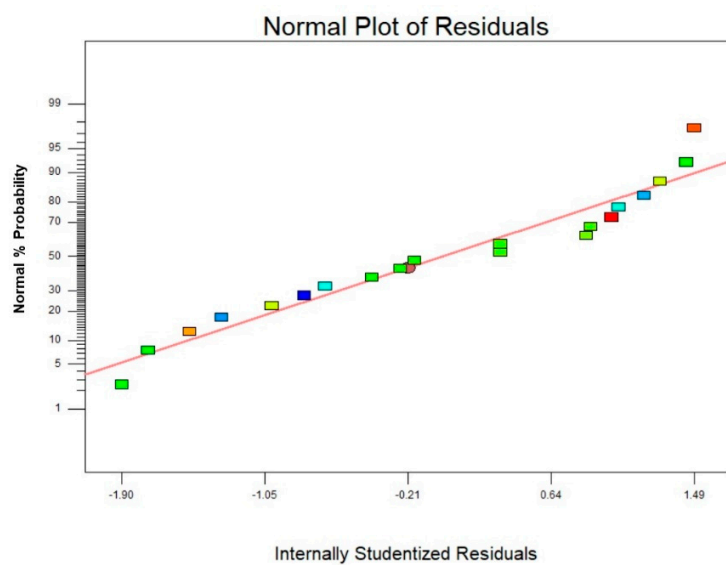

**Supplementary figure S2.** Normal plot of residuals for gel strength
